# Supplementary material
Source: PubMed Central journal article supplement (PMC10509783)

# Supplemental Figure 1

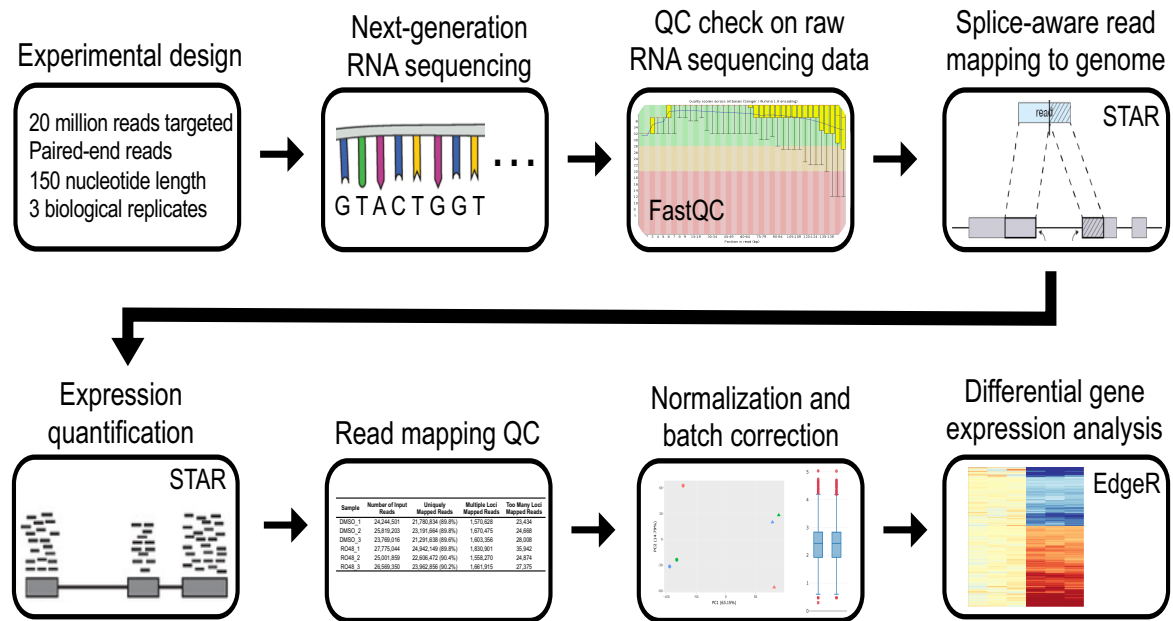

- **Supplemental Figure 1.** RNA sequencing analysis pipeline. Experimental design incorporates selecting the number of reads, read length, single- or paired-end reads, and number of biological replicates necessary for reliably detecting differences in gene expression. Sequencing of isolated RNA is performed using a high-throughput next-generation platform, such as the NovaSeq 6000 system from Illumina. Raw sequencing output undergoes quality control (QC) checks using the FastQC java tool to evaluate for errors during sequencing. Raw sequencing data are then mapped to the appropriate species genome using a splice-aware mapping tool, such as STAR (Spliced Transcripts Alignment to a Reference). Subsequently, mapped reads are quantified as raw counts of expression of a given gene. Mapped gene counts undergo further quality control analysis based on mapping statistics including percent of unmapped reads and the nature of mapped reads (singly mapping or multiple mappings per read). Raw gene counts are then normalized and batch corrected to produce gene counts that can be compared for differential expression using a differential expression analysis tool, such as EdgeR. Differentially expressed genes can then be used for functional analysis or downstream bioinformatics analysis.

Supplemental Figure 2

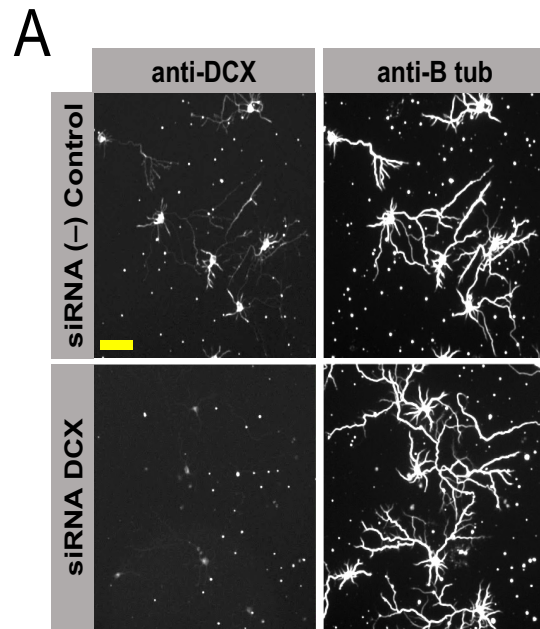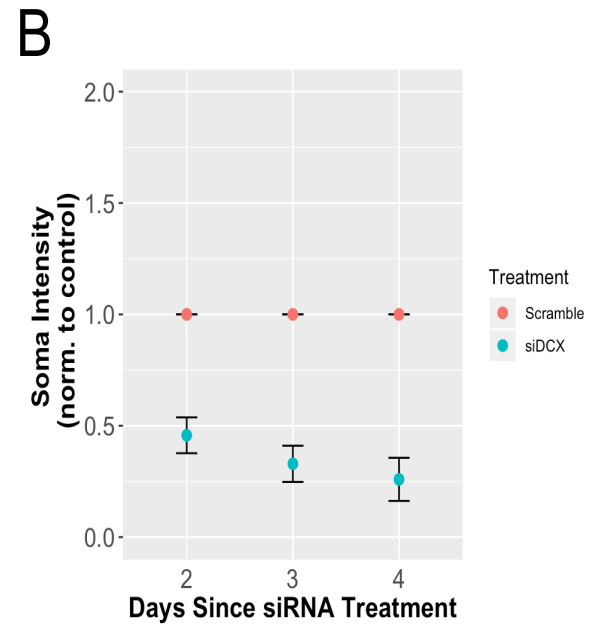

- **Supplemental Figure 2.** Doublecortin (DCX)-targeted siRNA effectively reduces DCX expression by two days after siRNA treatment and maintains reduced DCX expression for at least four days after siRNA treatment. E18 hippocampal neurons were treated with Doublecortin (DCX)-targeted siRNA or non-targeting (negative control) siRNA (“Scramble”) the same day or 24 hours after being plated. Neurons were fixed two, three, and four days after respective siRNA treatment. **(A)** Neurons were stained for DCX, BIII-tubulin, and with Hoechst and then imaged. Images depict neurons four days after siRNA treatment, at the period of maximum knockdown for the length of time tested. Scale bar indicates 100  $\mu\text{m}$ . **(B)** Quantification of neuronal soma fluorescence intensity representing DCX expression staining at two, three, and four days after siRNA treatment. The soma intensity of neurons treated with DCX-targeted siRNA (siDCX) is normalized to the soma intensity of the non-targeting siRNA for the respective timepoint. N=2, with at least 379 neurons counted per replicate. Error bars indicate the range.

Supplemental Figure 3

A

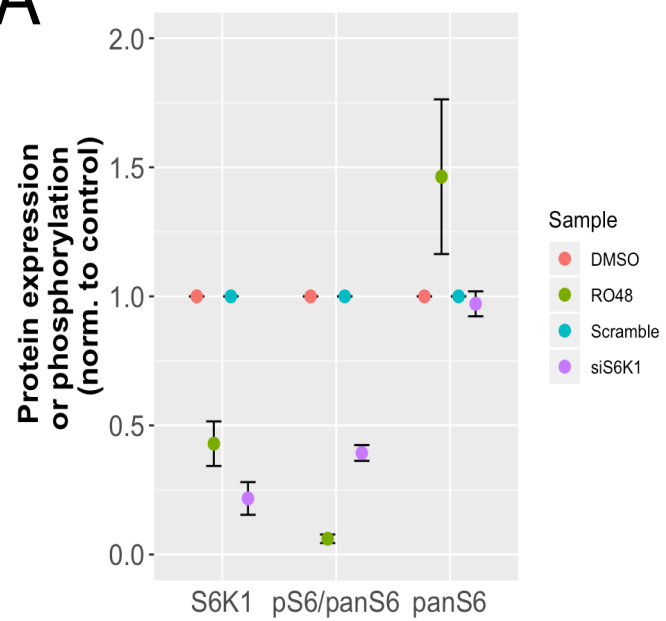

B

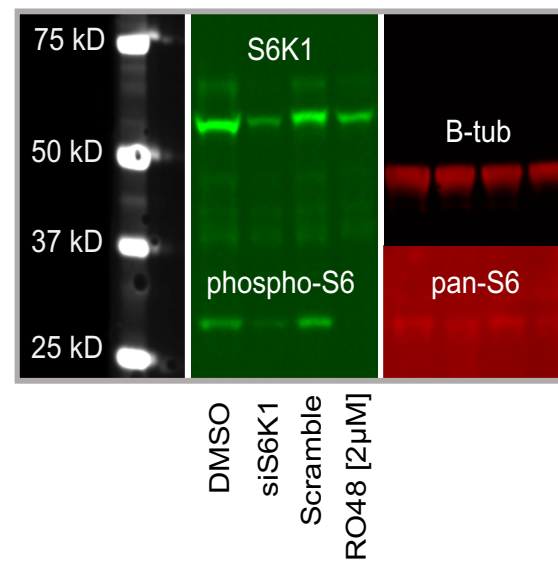

- **Supplemental Figure 3.** Ribosomal protein S6 kinase 1 (S6K1)-targeted siRNA and kinase inhibitor RO48 each reduces S6K1 protein expression and levels of phosphorylated ribosomal S6 protein. Hippocampal neurons were treated with either DMSO or RO48 [2  $\mu$ M] the day they were plated, or with S6K1-targeted siRNA (siS6K1) or non-targeting (negative control) siRNA (“Scramble”) one day after the neurons were plated. Neurons were grown for a total of five days before cellular lysates were collected for western blot quantification of protein expression. **(A)** Protein expression is calculated relative to total BIII-tubulin expression, and phosphorylated-ribosomal S6 levels are calculated relative to the total ribosomal S6 expression (pS6/panS6). The final expression or phosphorylation values for RO48 and siS6K1 are normalized to either DMSO or non-targeting siRNA values, respectively. N=3, each experiment performed in triplicate. Error bars indicate SEM. **(B)** Representative western blot image containing each of the treatment conditions to show the relevant band intensities and protein sizes.

Supplemental Figure 4

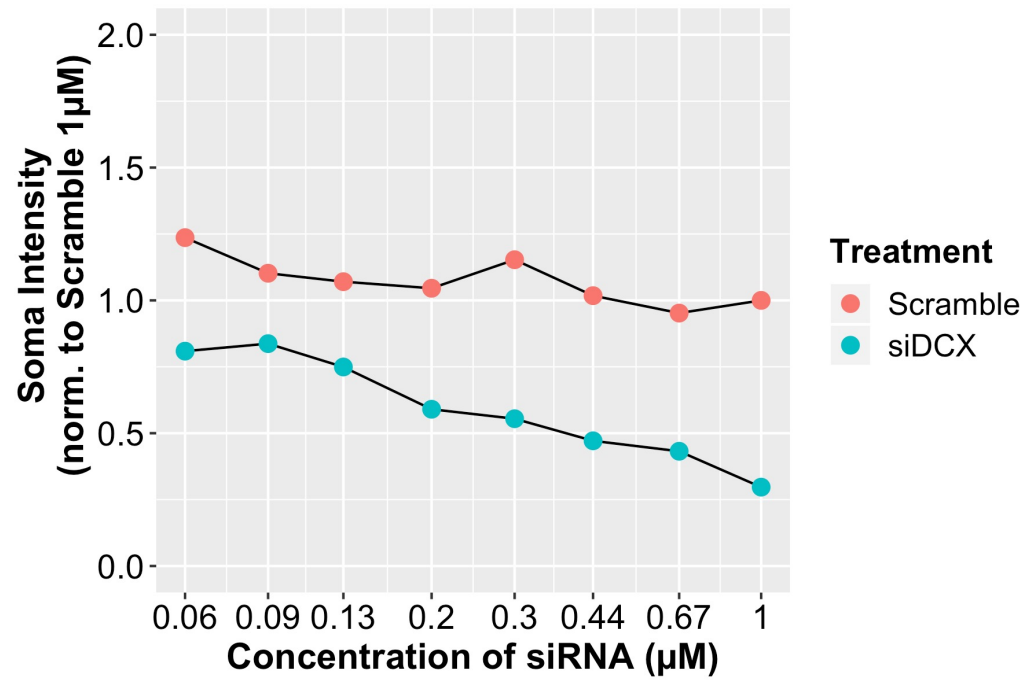

- **Supplemental Figure 4.** Doublecortin (DCX)-targeted siRNA produces optimum DCX knockdown at 1  $\mu$ M and this concentration is within the linear range of protein knockdown. Hippocampal neurons were plated at 2000 cells per well in a poly-D-lysine-coated 96-well plate. Neurons were treated with serially diluted Doublecortin (DCX)-targeting siRNA (siDCX) or non-targeting (negative control) siRNA (“Scramble”) one day after being plated, and were fixed four days after siRNA addition. Neurons were stained for DCX,  $\beta$ -tubulin, and nuclei (Hoechst) and then imaged. Soma intensity was measured by quantification of fluorescence derived from secondary antibody binding to anti-DCX at the neuron cell body, and intensity values were normalized to the intensity in non-targeting siRNA wells at the 1  $\mu$ M concentration. N=1, at least 315 neurons counted per treatment.



Supplemental Figure 5

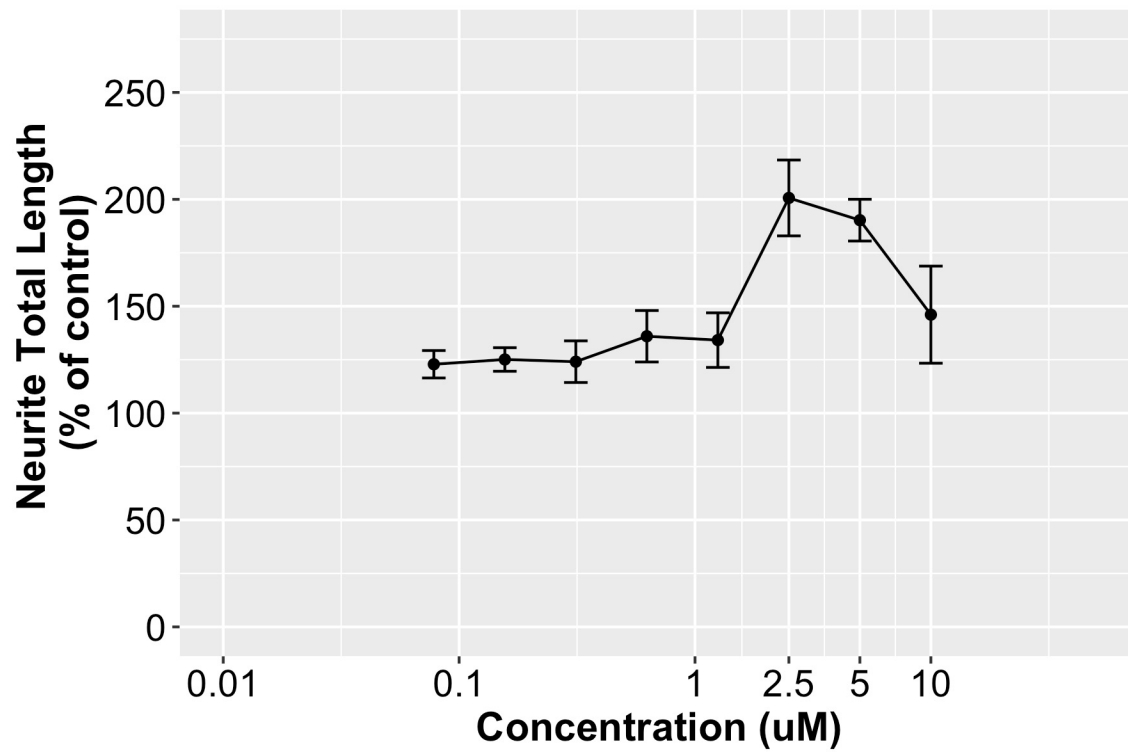

- **Supplemental Figure 5.** Dose-response with delayed RO48 treatment relative to day of plating. Rat embryonic hippocampal neurons were plated at 2000 cells per well in a poly(D-lysine)-coated 96-well plate. To mimic screening conditions, neurons were treated with either DMSO or serially diluted RO48 after three days in culture and were fixed two days later for a total of five days in culture. Neurons were stained with anti-BIII-tubulin to visualize neurites, and neurite outgrowth was quantified with automated neurite tracing. Neurite total length values were normalized to the value of control DMSO-treated neurons. N=4, performed in triplicate with at least 40 neurons counted per replicate. Error bars indicate SEM.

# Supplemental Figure 6

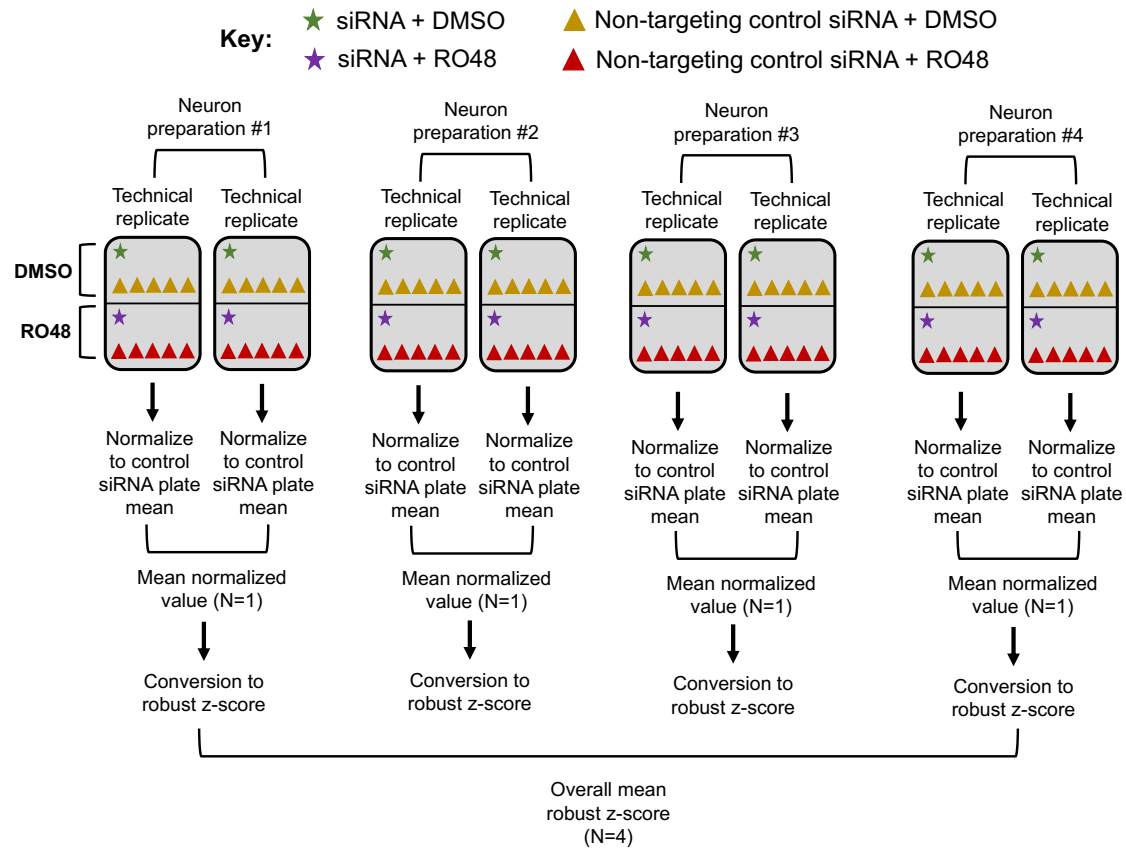

- **Supplemental Figure 6. siRNA screen experimental setup and analysis method.** Rat embryonic hippocampal neurons were plated in 96-well plates and treated with either siRNA targeting a transcription factor or a non-targeting control siRNA one day after being plated. All siRNA treatments are duplicated on a given plate to give two identical halves (shown oblong boxes containing triangles on the plate drawings). Two days after siRNA treatment, each half of a plate was treated with either DMSO or RO48 [2  $\mu$ M]. For a given neuronal preparation of hippocampi from one litter of embryos, six different sets of two identical treatment plates are created such that each siRNA + DMSO (green star) or siRNA + RO48 (purple star) treatment has two technical replicates. The two technical replicates are spread across two plates such that each plate has only one of the two replicates. Each siRNA + DMSO or siRNA + RO48 plate treatment is normalized to the five non-targeting control siRNA + DMSO (yellow triangle) or non-targeting control siRNA + RO48 (red triangle) replicates on the same plate. The two technical replicates for a given preparation, after normalization to the appropriate control siRNA group, are averaged to produce a single value for that hippocampal neuron preparation. The normalized assay value is converted to a robust Z-score using the values of all the other respective siRNA + DMSO or siRNA + RO48 treatments for that hippocampal neuron preparation. Finally, the four robust Z-scores acquired from the four different hippocampal neuron preparations are averaged to attain the mean robust Z-score for an siRNA + DMSO or siRNA + RO48 treatment.

Supplemental Figure 7

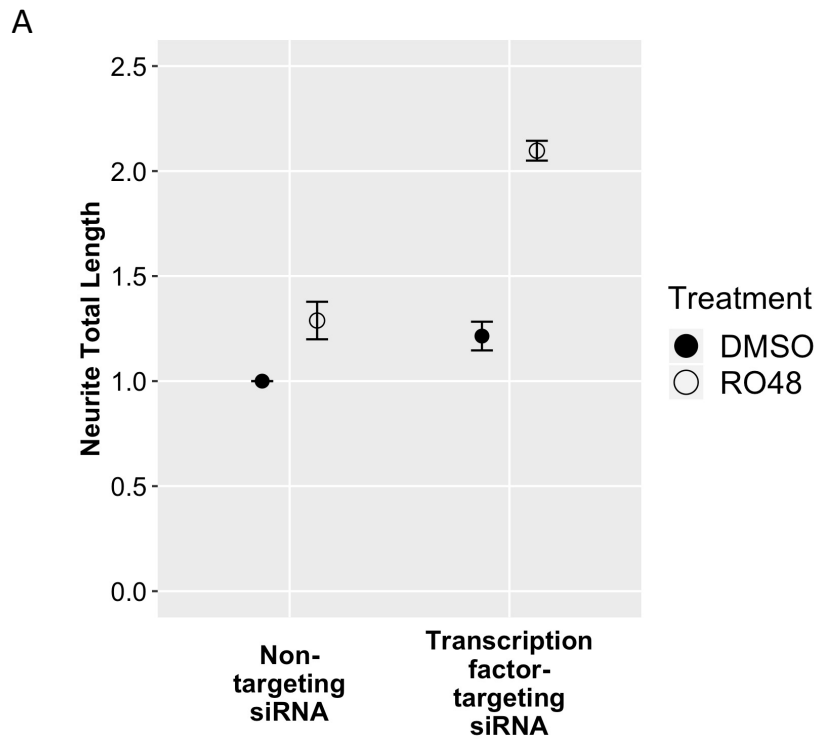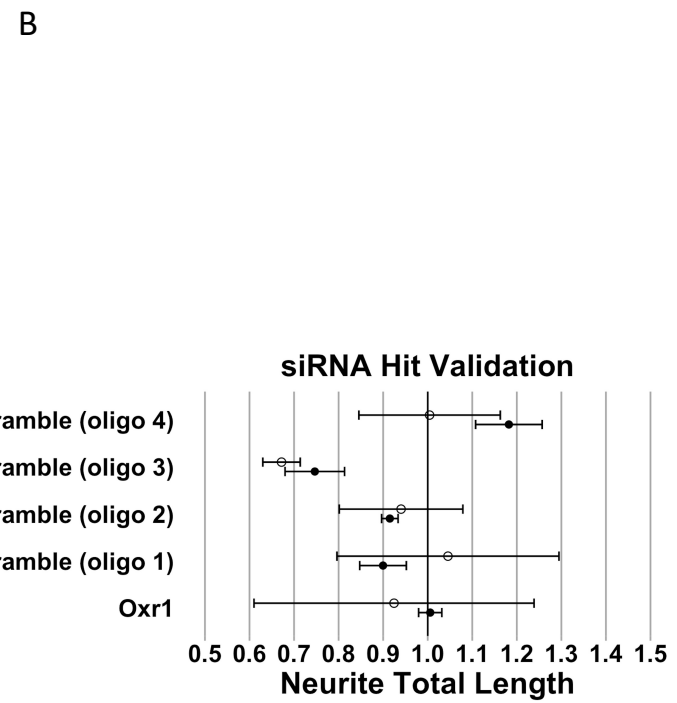

- **Supplemental Figure 7.** Non-targeting control siRNA treatment adversely affects neurite outgrowth relative to other transcription factor-targeting siRNA treatments. **(A)** Neurons were treated with either siRNA targeting a transcription factor or a non-targeting control siRNA one day after being plated. Two days after siRNA treatment neurons were treated with either DMSO or RO48 [2  $\mu$ M]. Neurons were fixed after a total of five days in culture. Biological replicates were considered the mean of all plates in a given neuron preparation such that each plate is a technical replicate (12 plates per neuron preparation) after grouping wells by DMSO or RO48 treatment (24-25 wells per treatment per plate). A technical replicate was the mean of the non-targeting control siRNA or targeting siRNA wells on a plate after normalizing all wells on a plate to the DMSO non-targeting control siRNA plate average. N=4, errors bars indicate SEM. **(B)** Hippocampal neurons were plated in quintuplicate in 96-well plates. After 1 day in culture neurons were treated with targeting or non-targeting (“Scramble”) siRNA, and two days later neurons were treated with either DMSO (0.02%; black) or RO48 [2  $\mu$ M] (white). Neurons were fixed after five total days in culture. Neurite total length was normalized separately by DMSO or RO48 treatment to the mean neurite total length of wells that received Scramble oligos 1, 2, or 4. N=3 for Scramble oligos, N=2 for Oxr1 siRNA. Error bars indicate 95%CI.

**Supplemental Table 1.** Per sample genome mapping quality of RNA sequencing output.

| <b>Sample</b> | <b>Number of Input Reads</b> | <b>Uniquely Mapped Reads</b> | <b>Multiple Loci Mapped Reads</b> | <b>Too Many Loci Mapped Reads</b> |
|---------------|------------------------------|------------------------------|-----------------------------------|-----------------------------------|
| DMSO_1        | 24,244,501                   | 21,780,834 (89.8%)           | 1,570,628                         | 23,434                            |
| DMSO_2        | 25,819,203                   | 23,191,664 (89.8%)           | 1,670,475                         | 24,668                            |
| DMSO_3        | 23,769,016                   | 21,291,638 (89.6%)           | 1,603,356                         | 28,008                            |
| RO48_1        | 27,775,044                   | 24,942,149 (89.8%)           | 1,830,901                         | 35,942                            |
| RO48_2        | 25,001,859                   | 22,606,472 (90.4%)           | 1,558,270                         | 24,874                            |
| RO48_3        | 26,569,350                   | 23,962,856 (90.2%)           | 1,661,915                         | 27,375                            |

**Supplemental Table 2:**

Transcription factor binding site enrichment scoring within the upregulated gene set or downregulated gene set, determined by differential expression in RO48-treated hippocampal neurons compared to DMSO-treated neurons.

**Transcription factors with binding sites enriched within upregulated gene set**

| TF Name     | TF ID    | Z-score | Fisher score | Motif             |
|-------------|----------|---------|--------------|-------------------|
| CTCF        | MA1102.1 | 7.415   | 3.081        | CNNCAGGGGGCNNN    |
| DMRT3       | MA0610.1 | 6.216   | 2.581        | NNTGTANCNNN       |
| DUX4        | MA0468.1 | 6.527   | 2.452        | TAANNNAATCA       |
| EGR2        | MA0472.2 | 5.89    | 2.34         | NCGCCCACGCN       |
| FIGLA       | MA0820.1 | 5.486   | 2.256        | NNCACCTGNN        |
| FOS::JUND   | MA1141.1 | 6.949   | 2.749        | NNNTGAGTCANNN     |
| FOXD1       | MA0031.1 | 6.646   | 3.829        | GTA AACAN         |
| FOXI1       | MA0042.2 | 7.509   | 5.478        | GTA AACA          |
| FO XK1      | MA0852.2 | 6.627   | 2.477        | NNNGTAAACANNNN    |
| FO XK2      | MA1103.1 | 9.331   | 5.166        | NNNTAAACANN       |
| FOXP1       | MA0481.2 | 9.336   | 4.582        | NNGTAAACANNN      |
| HIC2        | MA0738.1 | 9.891   | 3.324        | NTGCCNNN          |
| HSF4        | MA0771.1 | 5.229   | 2.148        | TTCNNGAANN TTC    |
| ID4         | MA0824.1 | 10.06   | 4.983        | NNCACCTGNN        |
| INSM1       | MA0155.1 | 5.715   | 2.301        | TGNNNGGGGNNN      |
| JUN         | MA0488.1 | 17.013  | 7.493        | NNNATGANGTNAT     |
| JUND        | MA0491.1 | 5.786   | 2.768        | NNTGANTCATN       |
| JUND(var.2) | MA0492.1 | 13.631  | 5.069        | NNNNATGANGTCATN   |
| Klf1        | MA0493.1 | 9.82    | 4.943        | NNCCACACCCN       |
| KLF4        | MA0039.3 | 13.435  | 5.584        | NNACACCCNNN       |
| Myod1       | MA0499.1 | 12.854  | 4.373        | NNCAGCTGNNNNN     |
| Myog        | MA0500.1 | 13.474  | 9.166        | NNCAGCTGNNN       |
| MZF1(var.2) | MA0057.1 | 6.064   | 2.341        | NNANGGGNNN        |
| NFIC        | MA0161.2 | 6.484   | 2.163        | NNCTGGCANN        |
| NFIX        | MA0671.1 | 10.278  | 2.701        | NNNGCCANN         |
| NR3C1       | MA0113.3 | 17.511  | 4.248        | NNGNACANNNTGTNCNN |
| NR3C2       | MA0727.1 | 21.826  | 5.445        | NNGNACANNNTGTNCNN |
| POU1F1      | MA0784.1 | 17.89   | 5.396        | NNTATGCNAATNAN    |
| POU2F1      | MA0785.1 | 11.649  | 5.31         | NNTATGNNAATN      |
| POU2F2      | MA0507.1 | 10.134  | 4.659        | NNNATTTGCATNN     |
| POU3F1      | MA0786.1 | 13.273  | 6.041        | NTATGNNAATNN      |
| POU3F2      | MA0787.1 | 12.717  | 5.48         | NTATGNNAATNN      |
| POU3F3      | MA0788.1 | 10.402  | 3.912        | NNTATGNNAATNN     |
| POU3F4      | MA0789.1 | 9.204   | 4.109        | TATGCNAAT         |
| POU4F1      | MA0790.1 | 8.034   | 2.082        | NTNNATNATTNATN    |
| POU5F1      | MA1115.1 | 12.355  | 7.105        | NNATGCAAANN       |



|               |          |        |       |                 |
|---------------|----------|--------|-------|-----------------|
| POU5F1B       | MA0792.1 | 9.091  | 3.548 | TATGNNAAT       |
| RELB          | MA1117.1 | 9.625  | 5.208 | NNATCCCCNN      |
| RUNX1         | MA0002.2 | 10.793 | 4.92  | NNNTGTGGNNN     |
| SNAI2         | MA0745.1 | 10.181 | 4.159 | NNCAGGTGN       |
| SREBF1        | MA0595.1 | 6.329  | 2.868 | NTCACNCCAN      |
| TAL1::TCF3    | MA0091.1 | 6.926  | 2.833 | NNANCATCTGNT    |
| TBP           | MA0108.2 | 7.313  | 2.371 | NTATANANNNNNNNN |
| Tcf12         | MA0521.1 | 9.45   | 4.629 | NNCAGCTGNNN     |
| TCF3          | MA0522.2 | 14.544 | 4.961 | NNCACCTGNN      |
| TCF4          | MA0830.1 | 12.382 | 2.734 | NNCACCTGNN      |
| TFAP2B        | MA0811.1 | 6.502  | 2.708 | NNCCNNNNGGCN    |
| TFAP2B(var.3) | MA0813.1 | 6.501  | 2.333 | NGCCCNNGGCN     |
| TWIST1        | MA1123.1 | 8.229  | 3.3   | NNCCAGATGTNN    |
| ZBTB18        | MA0698.1 | 6.915  | 3.376 | NNCCAGATGTNN    |
| Znf423        | MA0116.1 | 8.206  | 2.196 | NNNNCCNANGGNNN  |
| ZNF740        | MA0753.1 | 7.505  | 3.434 | NCCCCCENN       |

**Transcription factors with binding sites enriched within downregulated gene set**

| <b>TF Name</b> | <b>TF ID</b> | <b>Z-score</b> | <b>Fisher score</b> | <b>Motif</b>   |
|----------------|--------------|----------------|---------------------|----------------|
| ATF4           | MA0833.1     | 16.931         | 6.134               | NNNTGANGCAANN  |
| Bcl6           | MA0463.1     | 8.195          | 2.852               | NTTCCTNGANNNNN |
| Dux            | MA0611.1     | 4.291          | 2.048               | NCAATCAN       |
| E2F1           | MA0024.3     | 13.244         | 4.416               | NNNGGCGCCNNN   |
| E2F4           | MA0470.1     | 15.384         | 9.77                | NNGCGGGANNN    |
| E2F6           | MA0471.1     | 11.607         | 3.815               | NNGCGGGANNN    |
| E2F8           | MA0865.1     | 10.993         | 2.099               | TTCCCCGCCAAA   |
| EN2            | MA0642.1     | 4.369          | 2.389               | NNNAATTANN     |
| Esrra          | MA0592.2     | 6.467          | 2.999               | NTCAAGGTCAT    |
| FOSL1::JUNB    | MA1137.1     | 9.252          | 2.798               | NNNTGANTNANNN  |
| Gfi1           | MA0038.1     | 6.907          | 3.247               | NNAATCNNNN     |
| GSC            | MA0648.1     | 4.959          | 2.588               | NNTAATCCNN     |
| GSC2           | MA0891.1     | 7.464          | 2.367               | NNTAATCNNN     |
| HMBBOX1        | MA0895.1     | 6.694          | 3.939               | NNTAGTTANN     |
| Lhx8           | MA0705.1     | 8.582          | 5.389               | NTAATTAN       |
| LIN54          | MA0619.1     | 8.405          | 2.454               | NTTTNAANN      |
| MXI1           | MA1108.1     | 7.044          | 2.603               | NNCCACGTGNNN   |
| MYC            | MA0147.3     | 7.178          | 2.418               | NNCCACGTGNNN   |
| MYCN           | MA0104.4     | 5.478          | 2.623               | NNCCACGTGGNN   |
| MZF1(var.2)    | MA0057.1     | 4.859          | 2.191               | NNANGGGNNN     |
| NFAT5          | MA0606.1     | 7.33           | 2.556               | NNTTCCANN      |
| NFATC2         | MA0152.1     | 7.529          | 3.053               | TTTTCCN        |

|             |          |        |        |                 |
|-------------|----------|--------|--------|-----------------|
| NFIX        | MA0671.1 | 5.75   | 2.095  | NNNGCCANN       |
| NFKB2       | MA0778.1 | 6.626  | 2.215  | NGGGGANTCCCCN   |
| NFYA        | MA0060.3 | 20.884 | 12.26  | NNCCAATCANN     |
| NFYB        | MA0502.1 | 21.552 | 12.392 | NNNNNNNCCAATNAG |
| NKX2-3      | MA0672.1 | 6.95   | 2.189  | NNCACTTNNN      |
| NKX2-8      | MA0673.1 | 8.57   | 4.128  | NCACTTNNN       |
| NR4A1       | MA1112.1 | 4.052  | 2.596  | NNAAGGTCAN      |
| NR4A2::RXRA | MA1147.1 | 8.993  | 2.095  | NNGGNCNNTGACCNN |
| PITX3       | MA0714.1 | 5.486  | 2.435  | NNTAATCCN       |
| POU6F2      | MA0793.1 | 5.606  | 2.442  | NNCTNATTAN      |
| RHOXF1      | MA0719.1 | 4.807  | 3.35   | NTNANCCN        |
| RORA        | MA0071.1 | 5.028  | 2.832  | NNNNAGGTCA      |
| RORB        | MA1150.1 | 6.009  | 2.906  | ANNNNGGTCAN     |
| SIX1        | MA1118.1 | 5.269  | 2.324  | GNAACCTGANN     |
| SMAD3       | MA0795.1 | 9.225  | 3.633  | NGTCTAGACN      |
| Sox2        | MA0143.3 | 4.726  | 2.488  | CCNTTGTN        |
| STAT3       | MA0144.2 | 5.269  | 2.014  | NTTCNNGGAAN     |
| TFDP1       | MA1122.1 | 19.554 | 11.926 | NNGCGGGAANN     |

# Graphical abstract

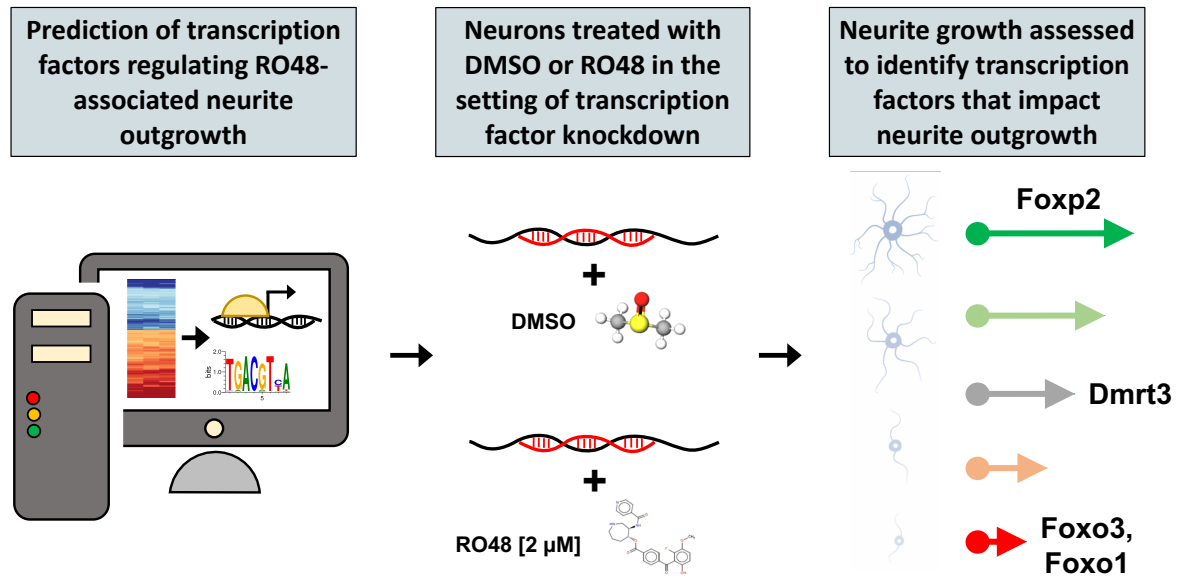

Supplement: NIHMS1929195-supplement-1.pdf [file NIHMS1929195-supplement-1.pdf]
